# Supplementary material for: A DFT and experimental investigation of the electron affinity of the triscyclopentadienyl uranium complexes Cp3UX
Source: Royal Society of Chemistry journal article supplement (doi:10.1039/b820873e), 2009-01-01

## SUPPLEMENTARY MATERIAL

**Suppl. S1:** optimized geometries of  $\text{Cp}_3\text{UX}$  complexes at the ZORA/BP86/TZP level (in gas phase)

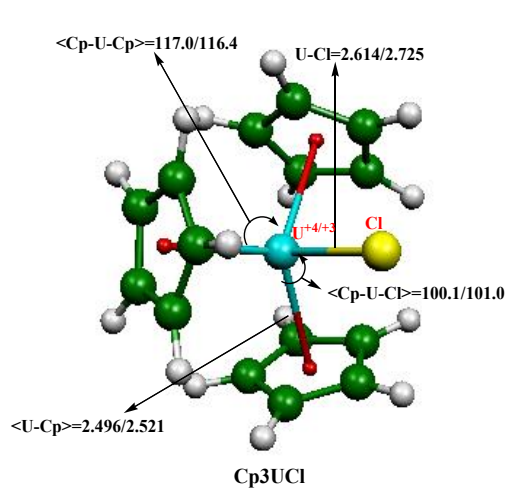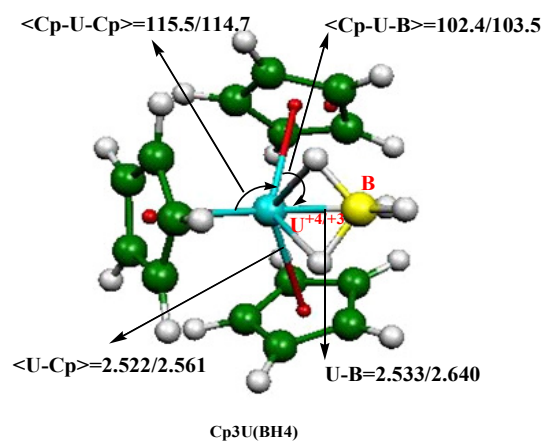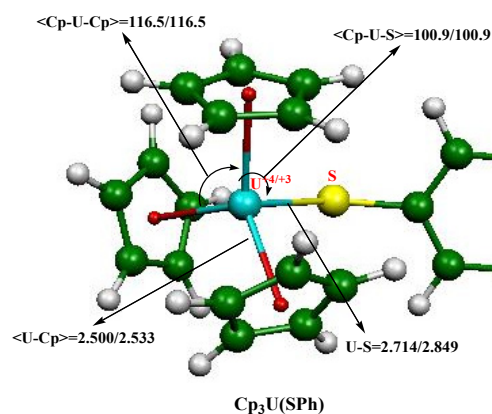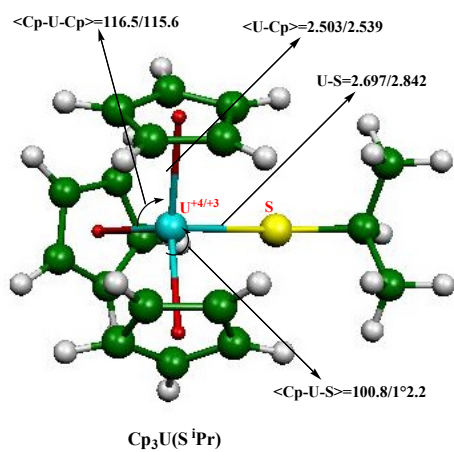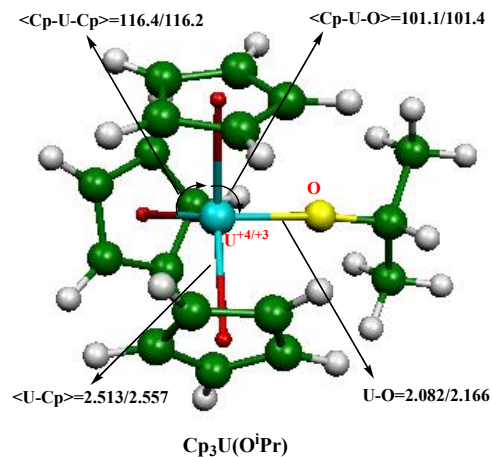

## Suppl. S2: optimized coordinates (ZORA/BP86/TZP)

### Optimized coordinates of Cp<sub>3</sub>UCl\_U(IV)

| Atom  | X         | Y         | Z (Angstrom) |
|-------|-----------|-----------|--------------|
| 1.U   | .000000   | .000000   | .560166      |
| 2.C   | 2.268820  | .708582   | -.845657     |
| 3.C   | 2.268820  | -.708582  | -.845657     |
| 4.C   | 2.524593  | -1.145529 | .487745      |
| 5.C   | 2.696955  | .000000   | 1.301014     |
| 6.C   | 2.524593  | 1.145529  | .487745      |
| 7.H   | 2.149703  | 1.346840  | -1.715848    |
| 8.H   | 2.149703  | -1.346840 | -1.715848    |
| 9.H   | 2.611429  | -2.175332 | .819988      |
| 10.H  | 2.892161  | .000000   | 2.368804     |
| 11.H  | 2.611429  | 2.175332  | .819988      |
| 12.C  | -.520760  | -2.319147 | -.845657     |
| 13.C  | -1.748060 | -1.610565 | -.845657     |
| 14.C  | -2.254354 | -1.613597 | .487745      |
| 15.C  | -1.348477 | -2.335632 | 1.301014     |
| 16.C  | -.270239  | -2.759126 | .487745      |
| 17.H  | .091546   | -2.535118 | -1.715848    |
| 18.H  | -2.241250 | -1.188277 | -1.715848    |
| 19.H  | -3.189607 | -1.173898 | .819988      |
| 20.H  | -1.446080 | -2.504685 | 2.368804     |
| 21.H  | .578178   | -3.349230 | .819988      |
| 22.C  | -1.748060 | 1.610565  | -.845657     |
| 23.C  | -.520760  | 2.319147  | -.845657     |
| 24.C  | -.270239  | 2.759126  | .487745      |
| 25.C  | -1.348477 | 2.335632  | 1.301014     |
| 26.C  | -2.254354 | 1.613597  | .487745      |
| 27.H  | -2.241250 | 1.188277  | -1.715848    |
| 28.H  | .091546   | 2.535118  | -1.715848    |
| 29.H  | .578178   | 3.349230  | .819988      |
| 30.H  | -1.446080 | 2.504685  | 2.368804     |
| 31.H  | -3.189607 | 1.173898  | .819988      |
| 32.Cl | .000000   | .000000   | 3.175060     |

### Optimized coordinates of Cp<sub>3</sub>UCl\_U(III)

| Atom | X         | Y         | Z (Angstrom) |
|------|-----------|-----------|--------------|
| 1.U  | .000000   | .000000   | .572264      |
| 2.C  | 2.302849  | .709870   | -.883850     |
| 3.C  | 2.302849  | -.709870  | -.883850     |
| 4.C  | 2.554469  | -1.150301 | .447905      |
| 5.C  | 2.711962  | .000000   | 1.266414     |
| 6.C  | 2.554469  | 1.150301  | .447905      |
| 7.H  | 2.158803  | 1.346532  | -1.752967    |
| 8.H  | 2.158803  | -1.346532 | -1.752967    |
| 9.H  | 2.626724  | -2.182476 | .778352      |
| 10.H | 2.881418  | .000000   | 2.339126     |
| 11.H | 2.626724  | 2.182476  | .778352      |
| 12.C | -.536660  | -2.349261 | -.883850     |
| 13.C | -1.766190 | -1.639391 | -.883850     |
| 14.C | -2.273425 | -1.637084 | .447905      |

|       |           |           |           |
|-------|-----------|-----------|-----------|
| 15.C  | -1.355981 | -2.348628 | 1.266414  |
| 16.C  | -.281044  | -2.787385 | .447905   |
| 17.H  | .086729   | -2.542844 | -1.752967 |
| 18.H  | -2.245532 | -1.196312 | -1.752967 |
| 19.H  | -3.203442 | -1.183571 | .778352   |
| 20.H  | -1.440709 | -2.495381 | 2.339126  |
| 21.H  | .576718   | -3.366048 | .778352   |
| 22.C  | -1.766190 | 1.639391  | -.883850  |
| 23.C  | -.536660  | 2.349261  | -.883850  |
| 24.C  | -.281044  | 2.787385  | .447905   |
| 25.C  | -1.355981 | 2.348628  | 1.266414  |
| 26.C  | -2.273425 | 1.637084  | .447905   |
| 27.H  | -2.245532 | 1.196312  | -1.752967 |
| 28.H  | .086729   | 2.542844  | -1.752967 |
| 29.H  | .576718   | 3.366048  | .778352   |
| 30.H  | -1.440709 | 2.495381  | 2.339126  |
| 31.H  | -3.203442 | 1.183571  | .778352   |
| 32.Cl | .000000   | .000000   | 3.305177  |

**Optimized coordinates of Cp<sub>3</sub>U(SPh)<sub>2</sub>U(IV)**

| Atom | X         | Y        | Z (Angstrom) |
|------|-----------|----------|--------------|
| 1.U  | -.085036  | 6.443641 | 11.800857    |
| 2.S  | -.891633  | 3.897270 | 11.322508    |
| 3.C  | -1.875062 | 6.900422 | 9.716864     |
| 4.C  | -1.267678 | 8.156872 | 9.981750     |
| 5.H  | -1.758817 | 9.037170 | 10.385435    |
| 6.C  | .093107   | 8.076760 | 9.589648     |
| 7.H  | .812944   | 8.889052 | 9.627265     |
| 8.C  | .319138   | 6.772049 | 9.061232     |
| 9.H  | 1.249972  | 6.404563 | 8.641533     |
| 10.C | -.896237  | 6.053616 | 9.136205     |
| 11.H | -1.055214 | 5.029683 | 8.813542     |
| 12.C | -1.151971 | 8.292750 | 13.597680    |
| 13.C | -2.270074 | 7.723364 | 12.925604    |
| 14.H | -2.945127 | 8.243860 | 12.254843    |
| 15.C | -2.379502 | 6.368793 | 13.328795    |
| 16.H | -3.131756 | 5.660734 | 12.995656    |
| 17.C | -1.339848 | 6.102318 | 14.263286    |
| 18.H | -1.159168 | 5.149549 | 14.756068    |
| 19.C | -.601431  | 7.296592 | 14.442758    |
| 20.H | .239440   | 7.432789 | 15.114864    |
| 21.C | 2.273565  | 5.174472 | 12.461646    |
| 22.C | 2.120108  | 6.182101 | 13.444478    |
| 23.H | 1.946895  | 6.012023 | 14.502419    |
| 24.C | 2.284879  | 7.447640 | 12.809073    |
| 25.H | 2.250111  | 8.419595 | 13.295276    |
| 26.C | 2.553776  | 7.212732 | 11.438229    |
| 27.H | 2.763506  | 7.969874 | 10.689656    |
| 28.C | 2.530358  | 5.808579 | 11.216873    |
| 29.H | 2.710963  | 5.301181 | 10.273950    |
| 30.H | 2.211432  | 4.104084 | 12.632130    |
| 31.H | -.811486  | 9.323292 | 13.519934    |
| 32.H | -2.907609 | 6.628957 | 9.918143     |
| 33.C | -1.057751 | 2.761578 | 12.699457    |
| 34.C | -2.327041 | 2.533852 | 13.262074    |
| 35.C | -2.508318 | 1.553101 | 14.239680    |
| 36.C | -1.427926 | .778562  | 14.675139    |
| 37.C | -.161770  | 1.000241 | 14.123666    |
| 38.C | .024087   | 1.980983 | 13.145071    |

|      |           |          |           |
|------|-----------|----------|-----------|
| 39.H | -3.177706 | 3.115307 | 12.906664 |
| 40.H | -3.504517 | 1.383882 | 14.652080 |
| 41.H | -1.574128 | .001430  | 15.426501 |
| 42.H | .687423   | .394902  | 14.445469 |
| 43.H | 1.007868  | 2.123988 | 12.697182 |

**Optimized coordinates of Cp<sub>3</sub>U(SPh)<sub>2</sub>U(III)**

| Atom | X         | Y        | Z (Angstrom) |
|------|-----------|----------|--------------|
| 1.U  | -.088782  | 6.460246 | 11.798956    |
| 2.S  | -.838290  | 3.756502 | 11.301628    |
| 3.C  | -1.915919 | 6.932930 | 9.749975     |
| 4.C  | -1.261061 | 8.182529 | 9.936042     |
| 5.H  | -1.709102 | 9.092957 | 10.323805    |
| 6.C  | .084017   | 8.045207 | 9.499312     |
| 7.H  | .833755   | 8.832456 | 9.499587     |
| 8.C  | .259803   | 6.711970 | 9.030576     |
| 9.H  | 1.173380  | 6.294697 | 8.616347     |
| 10.C | -.974647  | 6.027537 | 9.184861     |
| 11.H | -1.170891 | 4.993969 | 8.913859     |
| 12.C | -.936202  | 8.172377 | 13.867528    |
| 13.C | -2.074305 | 8.057610 | 13.022637    |
| 14.H | -2.508773 | 8.855194 | 12.427056    |
| 15.C | -2.556977 | 6.725491 | 13.106449    |
| 16.H | -3.408482 | 6.315297 | 12.568870    |
| 17.C | -1.726530 | 6.015282 | 14.018621    |
| 18.H | -1.833812 | 4.970618 | 14.301021    |
| 19.C | -.733191  | 6.909321 | 14.495417    |
| 20.H | .027426   | 6.679517 | 15.234831    |
| 21.C | 2.343493  | 5.247119 | 12.461385    |
| 22.C | 2.196848  | 6.265487 | 13.439606    |
| 23.H | 2.037238  | 6.108601 | 14.501689    |
| 24.C | 2.339389  | 7.525147 | 12.789557    |
| 25.H | 2.290351  | 8.501773 | 13.266883    |
| 26.C | 2.589380  | 7.279149 | 11.413329    |
| 27.H | 2.762498  | 8.034063 | 10.651223    |
| 28.C | 2.583263  | 5.873030 | 11.206128    |
| 29.H | 2.742754  | 5.360848 | 10.261033    |
| 30.H | 2.277265  | 4.176898 | 12.637003    |
| 31.H | -.352965  | 9.075385 | 14.037048    |
| 32.H | -2.951718 | 6.707053 | 9.989373     |
| 33.C | -1.022280 | 2.662502 | 12.692732    |
| 34.C | -2.288345 | 2.483639 | 13.293881    |
| 35.C | -2.487196 | 1.543772 | 14.306941    |
| 36.C | -1.425064 | .750809  | 14.761609    |
| 37.C | -.158670  | .927735  | 14.188903    |
| 38.C | .041132   | 1.867632 | 13.174085    |
| 39.H | -3.120458 | 3.090936 | 12.934573    |
| 40.H | -3.484140 | 1.424587 | 14.740562    |
| 41.H | -1.582738 | .007045  | 15.545520    |
| 42.H | .682954   | .317790  | 14.530257    |
| 43.H | 1.027529  | 1.985824 | 12.722437    |

**Optimized coordinates of Cp<sub>3</sub>U(BH<sub>4</sub>)<sub>2</sub>U(IV)**

| Atom | x          | Y           | z (Angstrom) |
|------|------------|-------------|--------------|
| 1.U  | 0.01435661 | -1.16308973 | 0.01336609   |
| 2.C  | 2.76170113 | -0.68350659 | 0.01128448   |
| 3.C  | 2.53360788 | -1.48444982 | 1.15819840   |
| 4.C  | 2.19186782 | -2.79368657 | 0.71651684   |

|      |             |             |             |
|------|-------------|-------------|-------------|
| 5.C  | 2.19039241  | -2.79235060 | -0.69647751 |
| 6.C  | 2.53180061  | -1.48245483 | -1.13669238 |
| 7.H  | 2.64777270  | -1.16292006 | -2.16764231 |
| 8.H  | 3.05334126  | 0.36213149  | 0.01187350  |
| 9.H  | 2.65056282  | -1.16638789 | 2.18947610  |
| 10.H | 2.00938875  | -3.65573257 | 1.35013116  |
| 11.H | 2.00747911  | -3.65370087 | -1.33103681 |
| 12.C | -1.33060387 | -0.51882193 | 2.37594540  |
| 13.C | -2.24789470 | -1.30308570 | 1.63336967  |
| 13.C | -1.76067975 | -2.64059297 | 1.60840751  |
| 14.C | -0.53912880 | -2.67405462 | 2.31846655  |
| 15.C | -0.26342026 | -1.35767065 | 2.78397216  |
| 16.H | 0.58523344  | -1.05628777 | 3.39008580  |
| 17.H | -1.42381792 | 0.54188780  | 2.58733853  |
| 18.H | -3.18243141 | -0.95325089 | 1.20610362  |
| 19.H | -2.26134806 | -3.49552629 | 1.16502207  |
| 20.H | 0.05722461  | -3.55937012 | 2.51469267  |
| 21.C | -1.35647886 | -0.52096718 | -2.33607571 |
| 22.C | -0.27911802 | -1.34246940 | -2.75359617 |
| 23.C | -0.53730467 | -2.66622535 | -2.29907688 |
| 24.C | -1.75706184 | -2.65442461 | -1.58543905 |
| 25.C | -2.26164945 | -1.32322545 | -1.59824693 |
| 26.H | -3.20047386 | -0.98978648 | -1.16717216 |
| 27.H | -1.46434887 | 0.54003334  | -2.53884298 |
| 28.H | 0.56432432  | -1.02485047 | -3.35878144 |
| 29.H | 0.06940992  | -3.54229104 | -2.50450204 |
| 30.H | -2.24524821 | -3.51942596 | -1.14737002 |
| 31.H | 0.67305007  | 0.84271187  | 0.99648549  |
| 32.B | 0.10655703  | 1.36151951  | 0.01313719  |
| 33.H | -1.05557422 | 0.90692245  | 0.02351543  |
| 34.H | 0.65200311  | 0.85538389  | -0.98789762 |
| 35.H | 0.14305760  | 2.56303008  | 0.02270639  |

**Optimized coordinates of Cp<sub>3</sub>U(BH<sub>4</sub>)<sub>2</sub>U(III)**

| Atom | x           | y           | z (Angstrom) |
|------|-------------|-------------|--------------|
| 1.U  | 0.00394889  | 0.13352495  | -0.00177890  |
| 2.C  | 2.79851559  | 0.60801432  | -0.00459915  |
| 3.C  | 2.57640472  | -0.19410096 | 1.14587640   |
| 4.C  | 2.22826103  | -1.50271043 | 0.70607031   |
| 5.C  | 2.22620720  | -1.50302000 | -0.71257497  |
| 6.C  | 2.57332544  | -0.19462996 | -1.15409276  |
| 7.H  | 2.66594027  | 0.13031864  | -2.18680024  |
| 8.H  | 3.05716950  | 1.66281357  | -0.00519161  |
| 9.H  | 2.67370026  | 0.13100705  | 2.17809542   |
| 10.H | 2.02500657  | -2.35969918 | 1.34211322   |
| 11.H | 2.02134441  | -2.36053589 | -1.34741213  |
| 12.C | -1.36089764 | 0.77237834  | 2.39828128   |
| 13.C | -2.28633839 | -0.01255511 | 1.66094257   |
| 14.C | -1.79915711 | -1.35019830 | 1.63038312   |
| 15.C | -0.57157220 | -1.38609640 | 2.34106538   |
| 16.C | -0.29606930 | -0.07110008 | 2.81193030   |
| 17.H | 0.56626286  | 0.23304978  | 3.39892756   |
| 18.H | -1.43687897 | 1.83982363  | 2.58390582   |
| 19.H | -3.21098584 | 0.34391594  | 1.21548538   |
| 20.H | -2.29259438 | -2.20130548 | 1.16945742   |
| 21.H | 0.03542617  | -2.26964396 | 2.51763376   |
| 22.C | -1.38645990 | 0.77051715  | -2.38508299  |
| 23.C | -0.31143511 | -0.05442411 | -2.81063292  |
| 24.C | -0.56666438 | -1.37713295 | -2.35001111  |

|                    |             |             |             |
|--------------------|-------------|-------------|-------------|
| 25.C               | -1.79083034 | -1.36436088 | -1.63303329 |
| 26.C               | -2.29702977 | -0.03351457 | -1.65010389 |
| 27.H               | -3.22501639 | 0.30532189  | -1.19785545 |
| 28.H               | -1.47858071 | 1.83821790  | -2.56172944 |
| 29.H               | 0.54450763  | 0.26690137  | -3.39779680 |
| 30.H               | 0.05202151  | -2.25044514 | -2.53601058 |
| 31.H               | -2.27000495 | -2.22646575 | -1.17700344 |
| 32.H               | 0.67311741  | 2.28072626  | 0.99405170  |
| 33.B               | 0.10898674  | 2.77079284  | 0.00181888  |
| 34.H               | -1.06184002 | 2.35235066  | 0.01229355  |
| 35.H               | 0.65756403  | 2.28850842  | -1.00330871 |
| 36. <sub>4</sub> H | 0.15464517  | 3.98375644  | 0.00668630  |

### Optimized Coordinates of Cp<sub>3</sub>U(S<sup>i</sup>Pr)<sub>2</sub>U(IV)

| Atom | X         | Y         | Z (Angstrom) |
|------|-----------|-----------|--------------|
| 1.U  | -.014109  | -.016487  | .587313      |
| 2.C  | 2.324772  | .691568   | -.711077     |
| 3.C  | 2.303039  | -.725324  | -.742588     |
| 4.C  | 2.498073  | -1.196306 | .589318      |
| 5.C  | 2.650869  | -.069848  | 1.433583     |
| 6.C  | 2.527472  | 1.095520  | .638773      |
| 7.H  | 2.245570  | 1.350699  | -1.570289    |
| 8.H  | 2.211414  | -1.341026 | -1.632234    |
| 9.H  | 2.559908  | -2.236750 | .895745      |
| 10.H | 2.822703  | -.086743  | 2.503166     |
| 11.H | 2.610108  | 2.115613  | 1.000800     |
| 12.C | -.446632  | -2.333727 | -.852401     |
| 13.C | -1.650997 | -1.600648 | -.994820     |
| 14.C | -2.301474 | -1.576869 | .271290      |
| 15.C | -1.508156 | -2.306340 | 1.188182     |
| 16.C | -.352688  | -2.761913 | .505018      |
| 17.H | .249899   | -2.573730 | -1.649614    |
| 18.H | -2.032440 | -1.174865 | -1.918401    |
| 19.H | -3.252097 | -1.102687 | .496071      |
| 20.H | -1.743496 | -2.472932 | 2.232823     |
| 21.H | .440834   | -3.370913 | .929249      |
| 22.C | -1.744314 | 1.589733  | -.840534     |
| 23.C | -.497152  | 2.262491  | -.905193     |
| 24.C | -.206480  | 2.768127  | .394932      |
| 25.C | -1.270961 | 2.411514  | 1.254310     |
| 26.C | -2.215357 | 1.670662  | .501753      |
| 27.H | -2.268035 | 1.137507  | -1.676629    |
| 28.H | .102133   | 2.410544  | -1.798797    |
| 29.H | .664754   | 3.351678  | .676201      |
| 30.H | -1.340339 | 2.637431  | 2.313388     |
| 31.H | -3.148332 | 1.267076  | .884261      |
| 32.S | -.327767  | .226589   | 3.255274     |
| 33.C | .190591   | -.902776  | 4.658793     |
| 34.H | -.104791  | -.312415  | 5.538640     |
| 35.C | -.590163  | -2.216068 | 4.680645     |
| 36.H | -1.671733 | -2.040129 | 4.613117     |
| 37.H | -.389543  | -2.757135 | 5.620602     |
| 38.H | -.289373  | -2.867110 | 3.848063     |
| 39.C | 1.697426  | -1.139297 | 4.723732     |
| 40.H | 2.252528  | -.192125  | 4.732392     |
| 41.H | 1.951572  | -1.691575 | 5.643772     |
| 42.H | 2.039210  | -1.736869 | 3.867347     |

**Optimized coordinates of Cp<sub>3</sub>U(S<sup>i</sup>Pr)<sub>2</sub>U(III)**

| Atom | X         | Y         | Z (Angstrom) |
|------|-----------|-----------|--------------|
| 1.U  | -.015715  | -.018929  | .607101      |
| 2.C  | 2.357186  | .657777   | -.783890     |
| 3.C  | 2.336646  | -.761426  | -.783362     |
| 4.C  | 2.532457  | -1.206046 | .555478      |
| 5.C  | 2.678970  | -.054902  | 1.378415     |
| 6.C  | 2.565038  | 1.095910  | .553349      |
| 7.H  | 2.252188  | 1.295841  | -1.658323    |
| 8.H  | 2.215500  | -1.394793 | -1.658516    |
| 9.H  | 2.587962  | -2.241139 | .882970      |
| 10.H | 2.842626  | -.045732  | 2.450517     |
| 11.H | 2.644055  | 2.125837  | .888831      |
| 12.C | -.467838  | -2.362304 | -.921165     |
| 13.C | -1.667138 | -1.613904 | -1.051141    |
| 14.C | -2.312188 | -1.589934 | .217326      |
| 15.C | -1.511938 | -2.329827 | 1.128787     |
| 16.C | -.365781  | -2.802924 | .429084      |
| 17.H | .235925   | -2.576522 | -1.721358    |
| 18.H | -2.036486 | -1.160231 | -1.968311    |
| 19.H | -3.257870 | -1.108923 | .449152      |
| 20.H | -1.740600 | -2.492621 | 2.176779     |
| 21.H | .431464   | -3.415705 | .842572      |
| 22.C | -1.731585 | 1.621057  | -.887102     |
| 23.C | -.479264  | 2.292664  | -.912992     |
| 24.C | -.208883  | 2.768223  | .401676      |
| 25.C | -1.292442 | 2.386625  | 1.237688     |
| 26.C | -2.232884 | 1.675198  | .443822      |
| 27.H | -2.225832 | 1.164783  | -1.740246    |
| 28.H | .145714   | 2.438142  | -1.790376    |
| 29.H | .662386   | 3.338020  | .712531      |
| 30.H | -1.380406 | 2.588452  | 2.302078     |
| 31.H | -3.172725 | 1.259363  | .796663      |
| 32.S | -.372835  | .313673   | 3.406429     |
| 33.C | .196728   | -.903740  | 4.706659     |
| 34.H | -.060990  | -.396799  | 5.650719     |
| 35.C | -.564906  | -2.230644 | 4.663244     |
| 36.H | -1.650045 | -2.059907 | 4.641850     |
| 37.H | -.325114  | -2.851640 | 5.546945     |
| 38.H | -.293618  | -2.802337 | 3.764486     |
| 39.C | 1.707306  | -1.142363 | 4.698007     |
| 40.H | 2.255614  | -.191718  | 4.743847     |
| 41.H | 2.012694  | -1.763989 | 5.560457     |
| 42.H | 2.009867  | -1.663136 | 3.778279     |

**Optimized coordinates of Cp<sub>3</sub>U(O<sup>i</sup>Pr)<sub>2</sub>U(IV)**

| Atom | X        | Y         | Z (Angstrom) |
|------|----------|-----------|--------------|
| 1.U  | .012669  | .018403   | .646978      |
| 2.C  | 2.260662 | .310108   | -1.043563    |
| 3.C  | 2.312658 | -1.009562 | -.528162     |
| 4.C  | 2.555883 | -.925403  | .873677      |
| 5.C  | 2.692371 | .451820   | 1.208438     |
| 6.C  | 2.535419 | 1.206338  | .024394      |
| 7.H  | 2.093294 | .582564   | -2.083427    |
| 8.H  | 2.200799 | -1.924504 | -1.101487    |
| 9.H  | 2.656617 | -1.757565 | 1.565319     |
| 10.H | 2.902183 | .853228   | 2.195503     |
| 11.H | 2.668425 | 2.281284  | -.078201     |

|      |           |           |           |
|------|-----------|-----------|-----------|
| 12.C | -.653810  | -2.252989 | -.826535  |
| 13.C | -1.867726 | -1.543576 | -.655362  |
| 14.C | -2.221714 | -1.607512 | .725628   |
| 15.C | -1.238322 | -2.382588 | 1.391269  |
| 16.C | -.262291  | -2.766124 | .444716   |
| 17.H | -.134171  | -2.408850 | -1.768195 |
| 18.H | -2.450166 | -1.076295 | -1.443528 |
| 19.H | -3.113004 | -1.186645 | 1.180956  |
| 20.H | -1.218430 | -2.609612 | 2.453437  |
| 21.H | .626363   | -3.355509 | .652059   |
| 22.C | -1.602439 | 1.708570  | -.860835  |
| 23.C | -.369897  | 2.391268  | -.711710  |
| 24.C | -.241494  | 2.770361  | .658520   |
| 25.C | -1.410034 | 2.346823  | 1.339027  |
| 26.C | -2.242335 | 1.676874  | .414326   |
| 27.H | -2.014063 | 1.328202  | -1.791599 |
| 28.H | .333422   | 2.620640  | -1.506507 |
| 29.H | .586649   | 3.317875  | 1.100028  |
| 30.H | -1.613037 | 2.486733  | 2.396661  |
| 31.H | -3.211902 | 1.237759  | .630776   |
| 32.O | .024952   | .078950   | 2.727580  |
| 33.C | -.032529  | .272443   | 4.135385  |
| 34.H | .278109   | 1.315514  | 4.338785  |
| 35.C | -1.468605 | .085488   | 4.631086  |
| 36.H | -2.151295 | .760809   | 4.099522  |
| 37.H | -1.540512 | .294925   | 5.708545  |
| 38.H | -1.801452 | -.947372  | 4.454787  |
| 39.C | .949124   | -.675166  | 4.828514  |
| 40.H | 1.967572  | -.525307  | 4.447354  |
| 41.H | .955392   | -.504923  | 5.915493  |
| 42.H | .661770   | -1.720629 | 4.642177  |

**Optimized coordinates of Cp<sub>3</sub>U(O<sup>i</sup>Pr)<sub>2</sub>U(III)**

| Atom | X         | Y         | Z (Angstrom) |
|------|-----------|-----------|--------------|
| 1.U  | .007731   | .015310   | .645106      |
| 2.C  | 2.296049  | .231484   | -1.050417    |
| 3.C  | 2.375121  | -1.065929 | -.476015     |
| 4.C  | 2.636318  | -.922222  | .914065      |
| 5.C  | 2.741101  | .470503   | 1.194963     |
| 6.C  | 2.523305  | 1.181721  | -.011268     |
| 7.H  | 2.136462  | .454511   | -2.103750    |
| 8.H  | 2.259979  | -2.006001 | -1.008291    |
| 9.H  | 2.743404  | -1.728001 | 1.636818     |
| 10.H | 2.915618  | .914209   | 2.172790     |
| 11.H | 2.522268  | 2.262711  | -.120002     |
| 12.C | -.622386  | -2.283174 | -.886809     |
| 13.C | -1.850487 | -1.578680 | -.790707     |
| 14.C | -2.286963 | -1.636147 | .566064      |
| 15.C | -1.329794 | -2.387642 | 1.299033     |
| 16.C | -.296607  | -2.781423 | .410273      |
| 17.H | -.040284  | -2.426531 | -1.794462    |
| 18.H | -2.374431 | -1.094203 | -1.610610    |
| 19.H | -3.199424 | -1.201578 | .966121      |
| 20.H | -1.360642 | -2.590001 | 2.366638     |
| 21.H | .584501   | -3.362794 | .671309      |
| 22.C | -1.674574 | 1.752087  | -.819494     |
| 23.C | -.432033  | 2.433046  | -.728112     |
| 24.C | -.239443  | 2.816746  | .632373      |
| 25.C | -1.368977 | 2.377867  | 1.372371     |



|      |           |           |           |
|------|-----------|-----------|-----------|
| 26.C | -2.253625 | 1.713106  | .483557   |
| 27.H | -2.115143 | 1.348724  | -1.727855 |
| 28.H | .250309   | 2.630180  | -1.551420 |
| 29.H | .614284   | 3.356725  | 1.034890  |
| 30.H | -1.516031 | 2.507739  | 2.442074  |
| 31.H | -3.209961 | 1.268607  | .745759   |
| 32.O | .017219   | .014103   | 2.811076  |
| 33.C | -.012452  | .301755   | 4.174516  |
| 34.H | .268719   | 1.367646  | 4.336564  |
| 35.C | -1.432096 | .110408   | 4.734640  |
| 36.H | -2.140314 | .732107   | 4.170153  |
| 37.H | -1.490169 | .384530   | 5.801681  |
| 38.H | -1.740687 | -.940398  | 4.620946  |
| 39.C | 1.011254  | -.566167  | 4.925957  |
| 40.H | 2.012779  | -.413744  | 4.501472  |
| 41.H | 1.040674  | -.324078  | 6.001794  |
| 42.H | .752558   | -1.630181 | 4.809256  |

### Suppl. S3: numbering of atoms of Suppl. S2

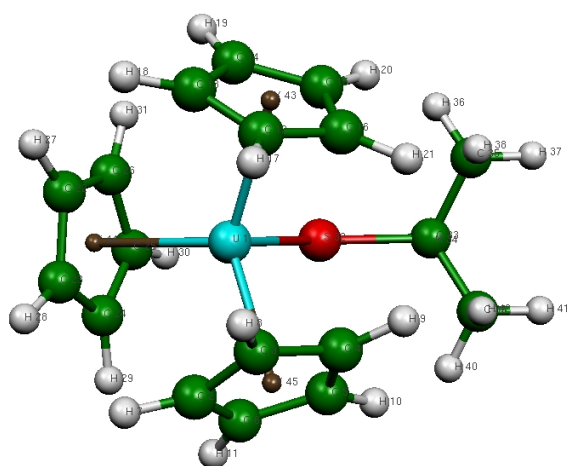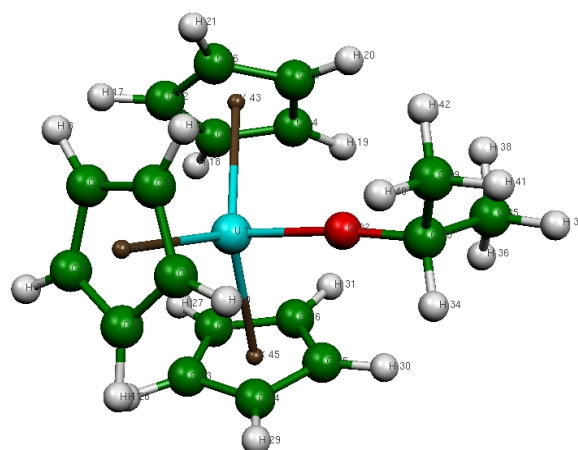

**Cp<sub>3</sub>U(OiPr)**

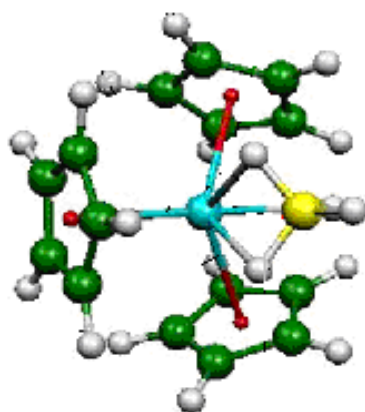

**Cp<sub>3</sub>UBH<sub>4</sub>**

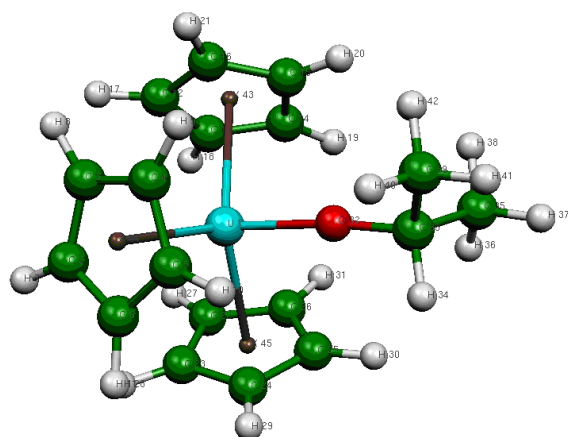

**Cp<sub>3</sub>U(SPh)**

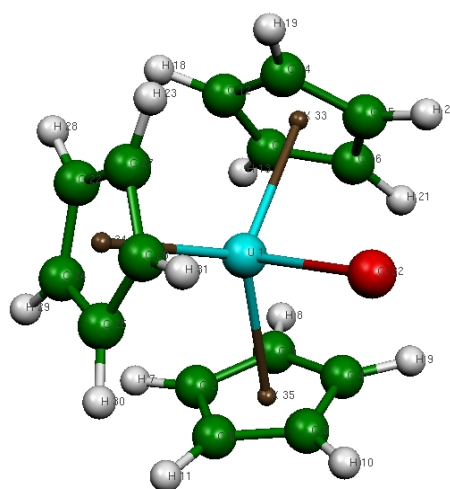

**Cp<sub>3</sub>UCl**

**Suppl. S4:** Frontier MO diagrams of the U(IV) complexes  
(percentages 6d/5f/U/X between brackets)

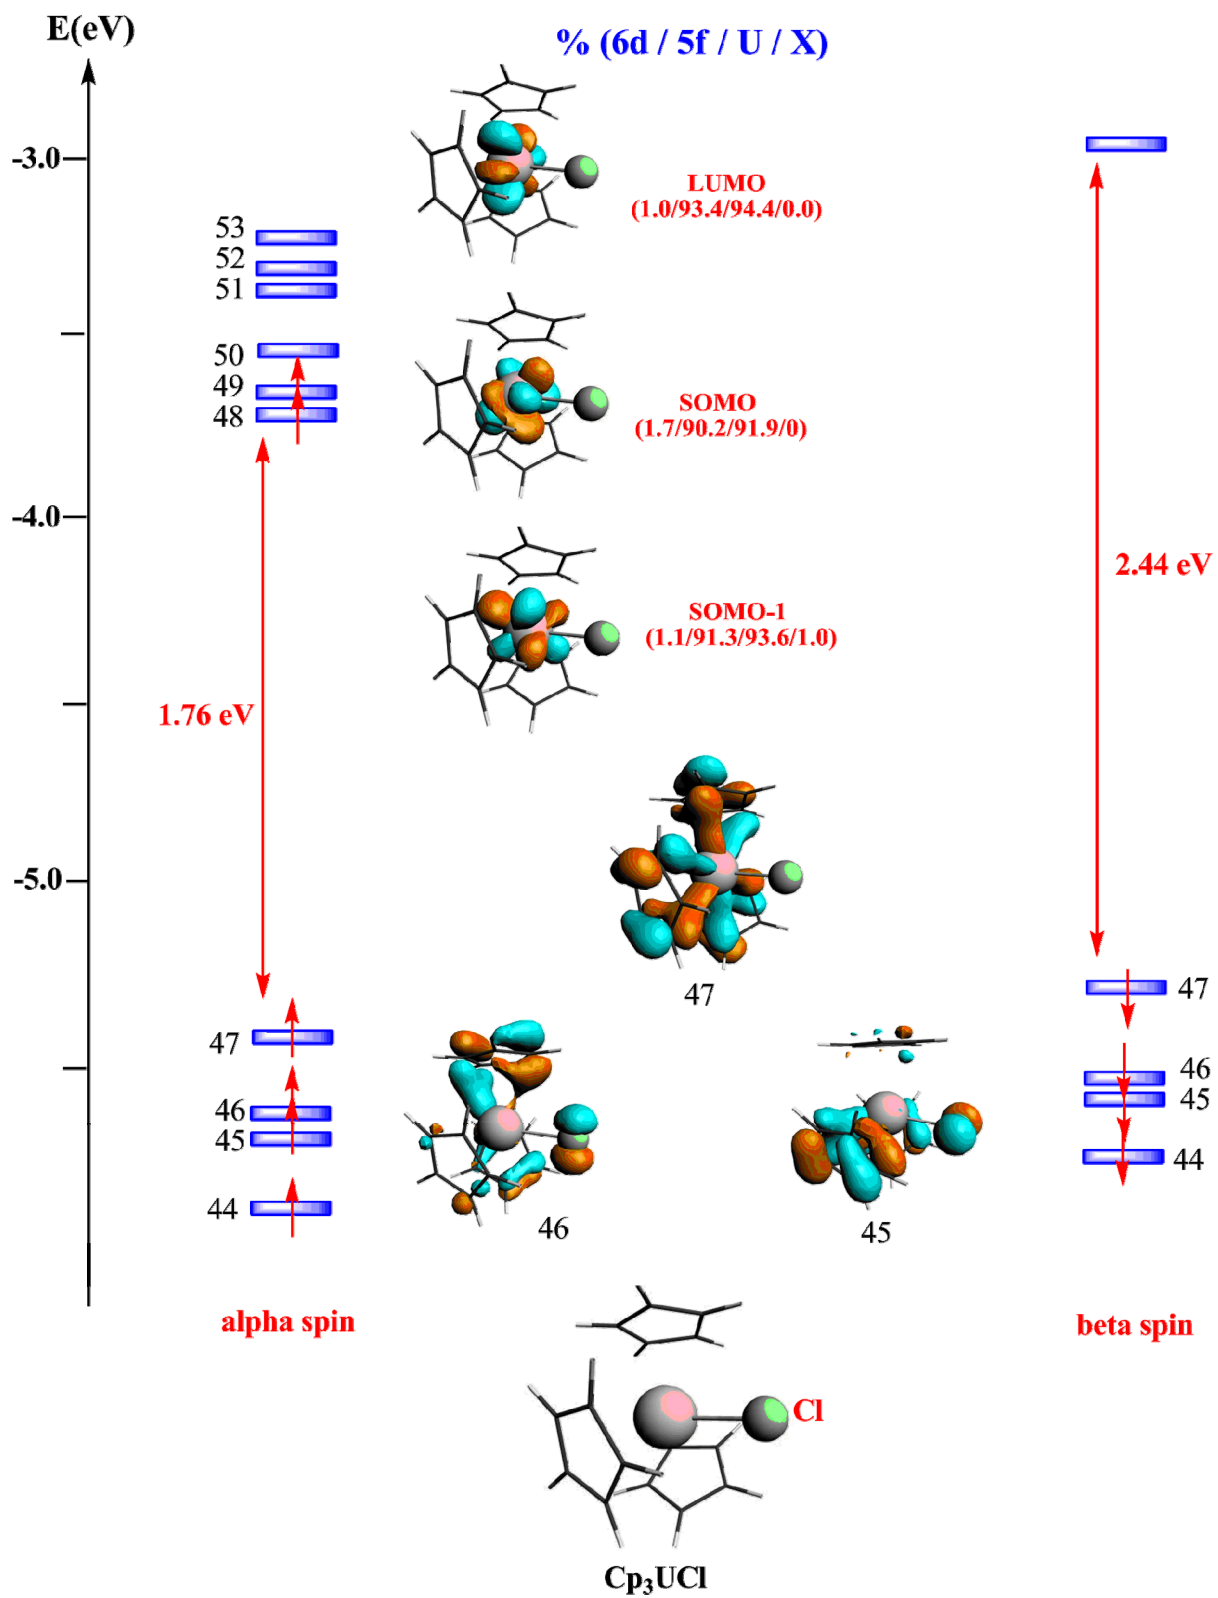

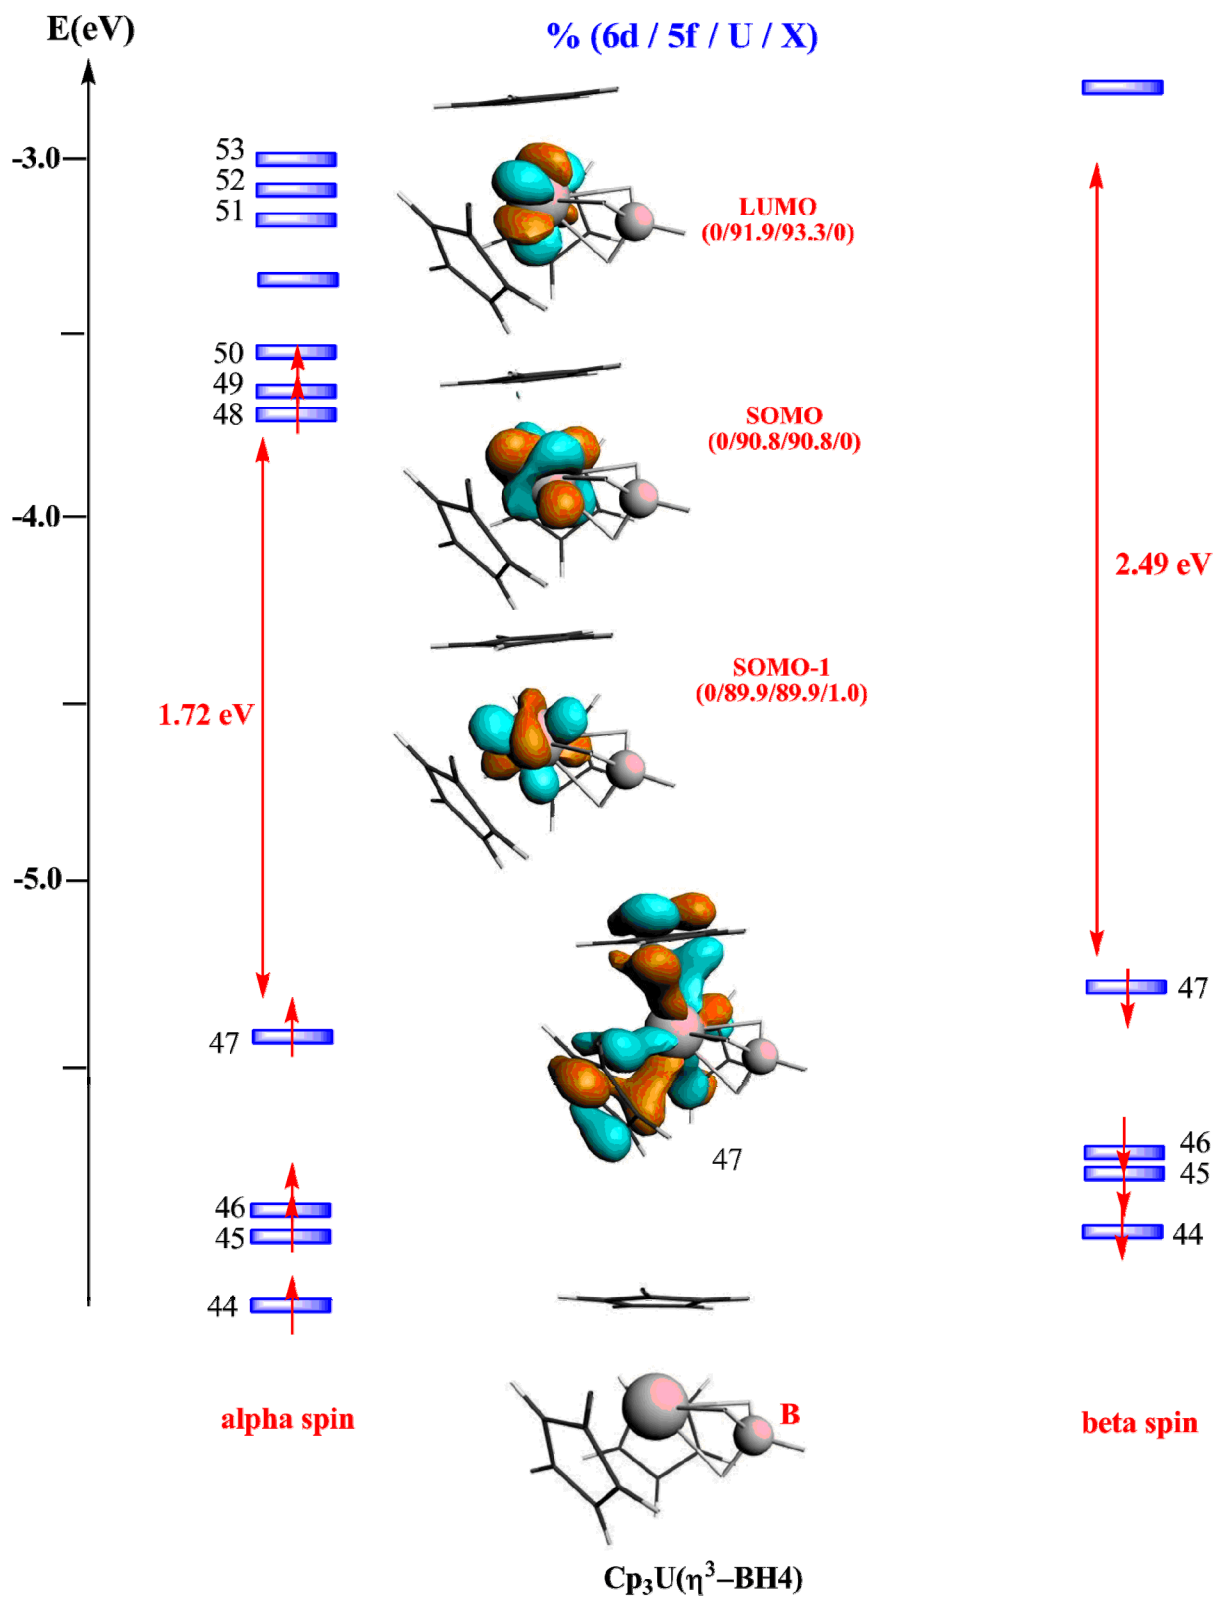

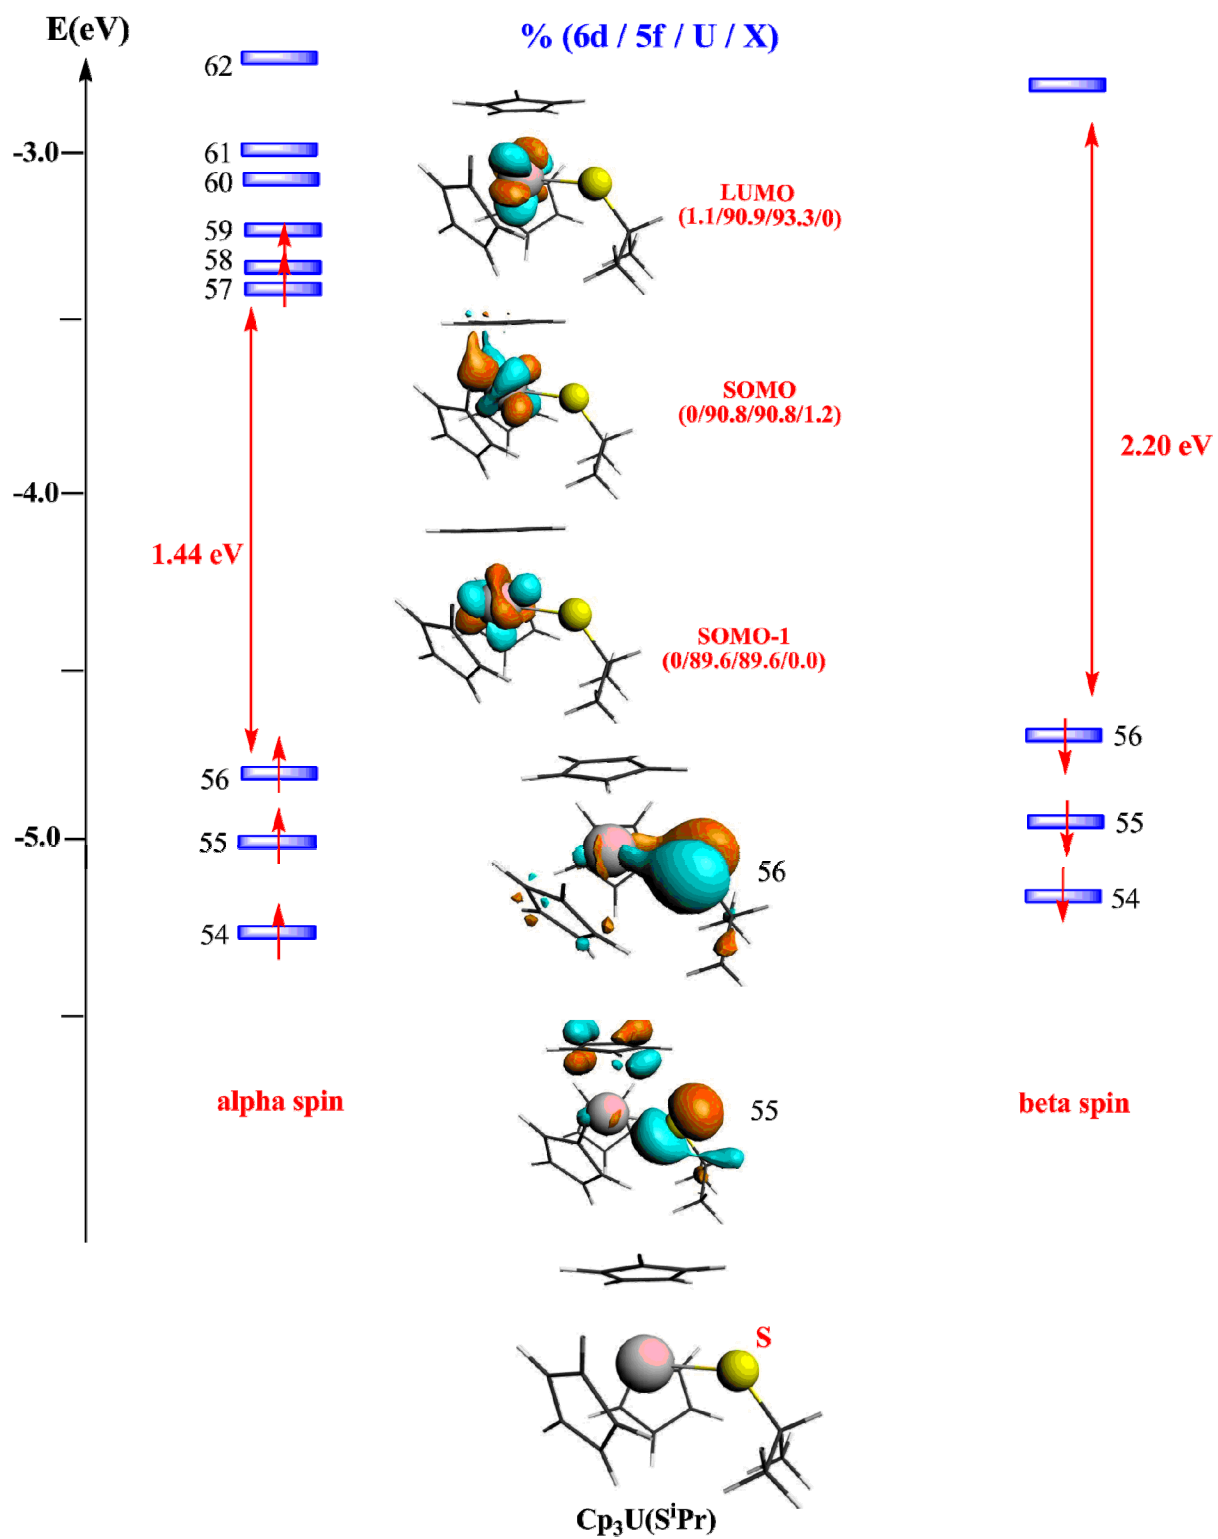

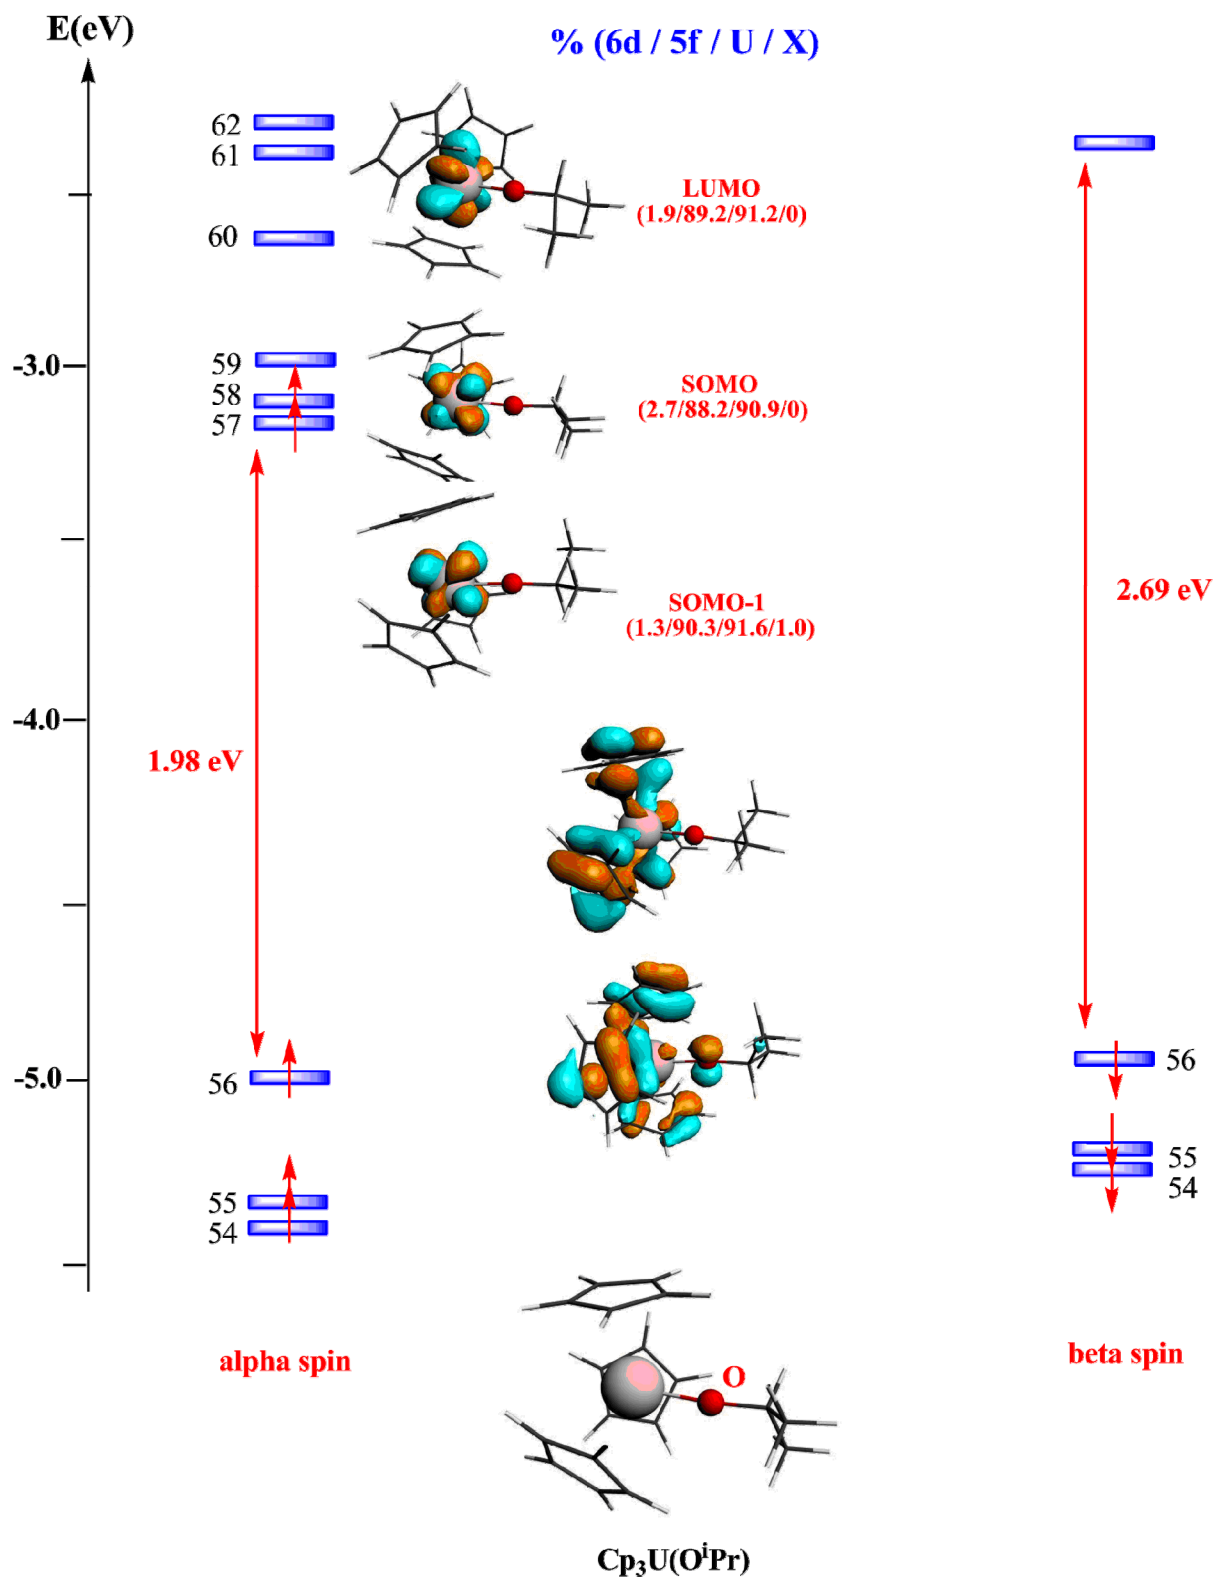

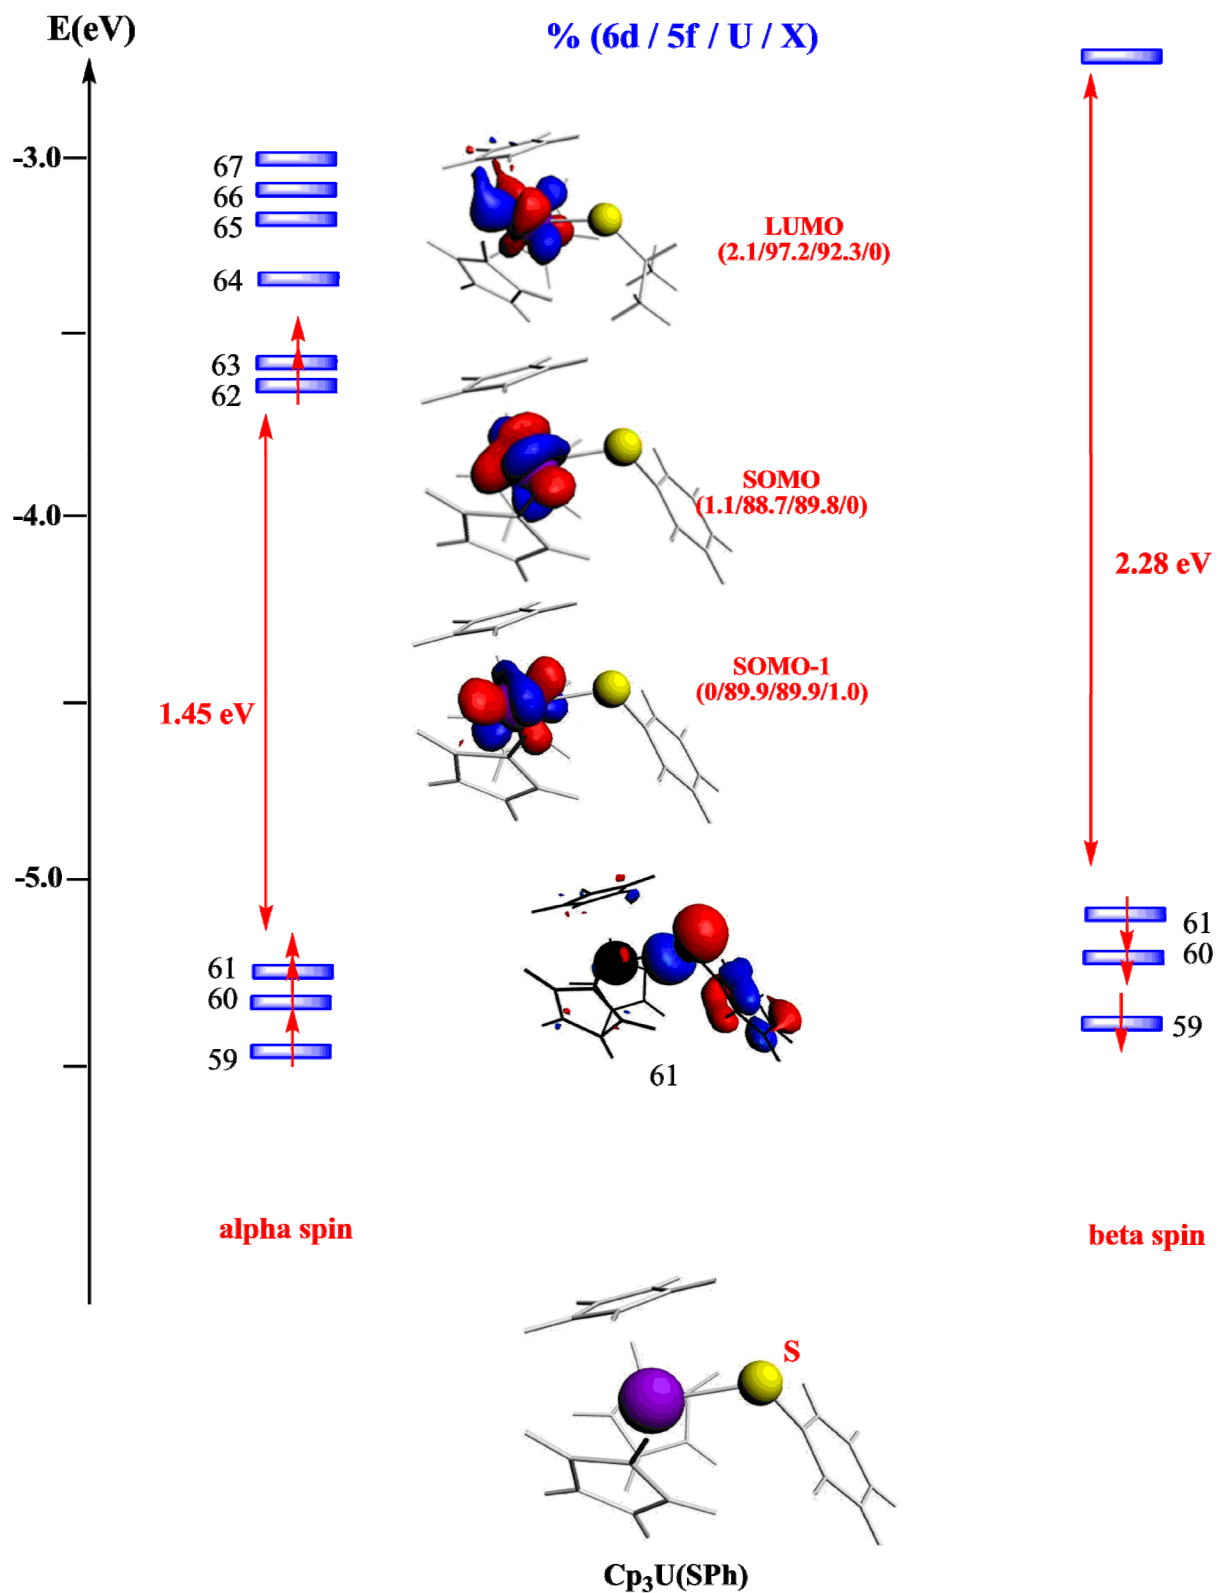

Supplement: b820873e.pdf [file b820873e.pdf]
